# Supplementary material for: Initial non-invasive in vivo sensing of the lung using time domain diffuse optics
Source: Research Square preprint supplement (doi:10.21203/rs.3.rs-3263459/v1), 2023-08-22
Supplement: Supplementary file 1 [file eebdf5d4ce766e733d3920a3.pdf]

# Initial non-invasive in vivo sensing of the lung using time domain diffuse optics

Antonio Pifferi<sup>1,2</sup>, Massimo Miniati<sup>3</sup>, Andrea Farina<sup>2</sup>, Sanathana Konugolu Venkata Sekar<sup>4</sup>, Pranav Lanka<sup>4</sup>, Alberto Dalla Mora<sup>1</sup>, Giulia Maffei<sup>1,\*</sup>, and Paola Taroni<sup>1,2</sup>

<sup>1</sup>Politecnico di Milano, Dipartimento di Fisica, 20133, Milan, Italy

<sup>2</sup>INFN-CNR, Consiglio Nazionale delle Ricerche, Istituto di Fotonica e Nanotecnologie, 20133, Milan, Italy

<sup>3</sup>University of Florence, Department of Experimental and Clinical Medicine, 50134, Florence, Italy

<sup>4</sup>Biophotonics@Tyndall, IPIC, Tyndall National Institute, T12R5CP, Cork, Ireland

\*giulia.maffei@polimi.it

## Supplementary information

The following figures are attached as supplementary figures to the main figures, showing the other protocol (Prot5) with 5s duration of each phase and 10 repetitions (the first one with normal breathing), and the non-refolded analysis.

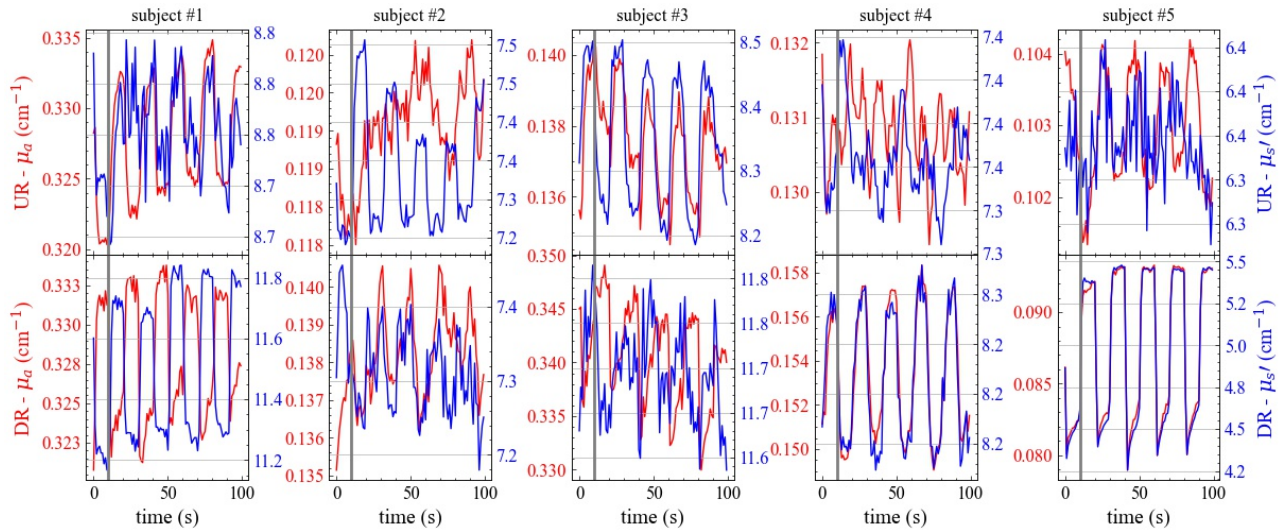

Figure 1. Supplementary Figure S1 to Fig. 5.

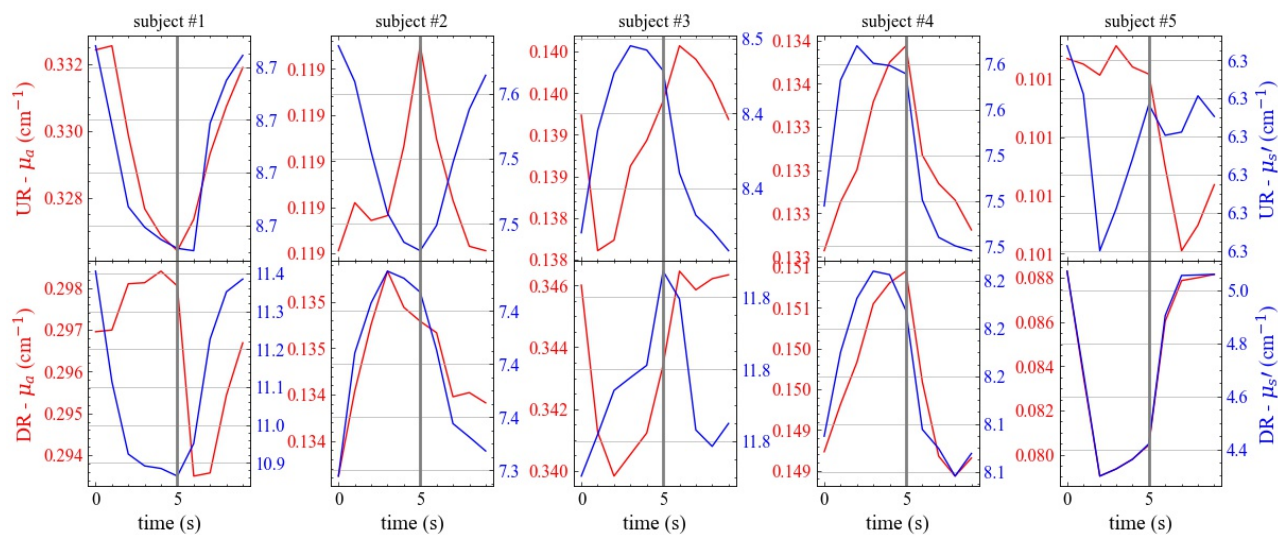

**Figure 2.** Supplementary Figure S2 to Fig. 5.

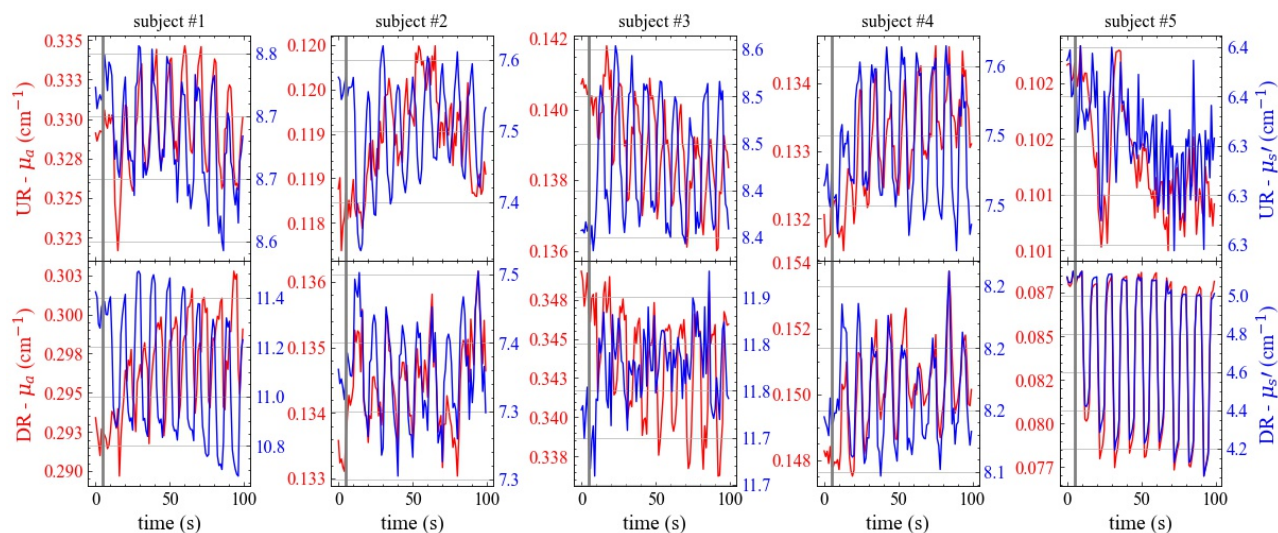

**Figure 3.** Supplementary Figure S3 to Fig. 5

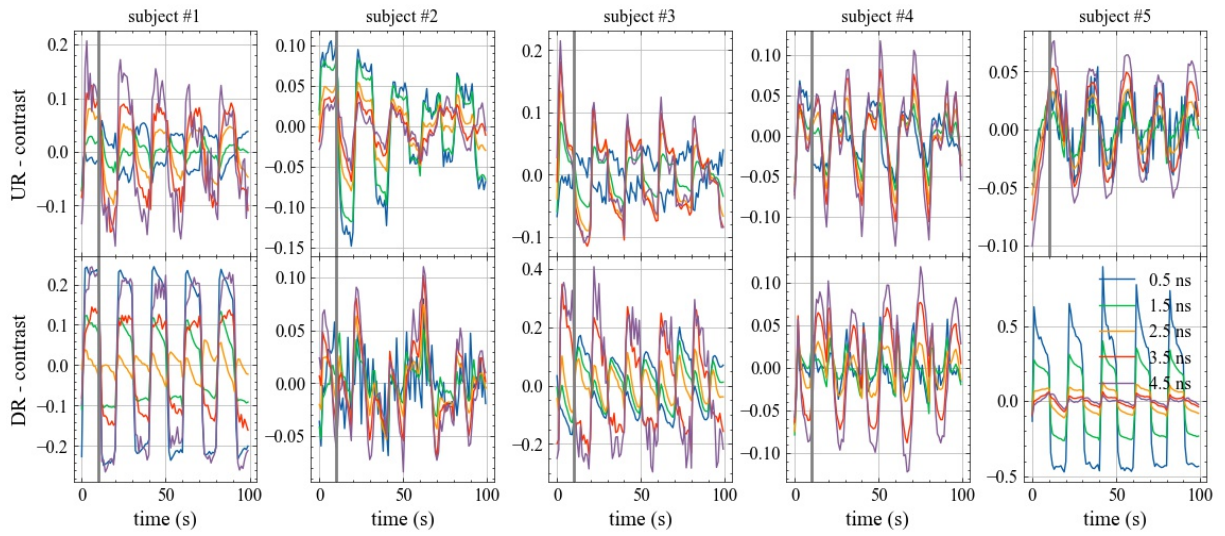

**Figure 4.** Supplementary Figure S4 to Fig. 6.

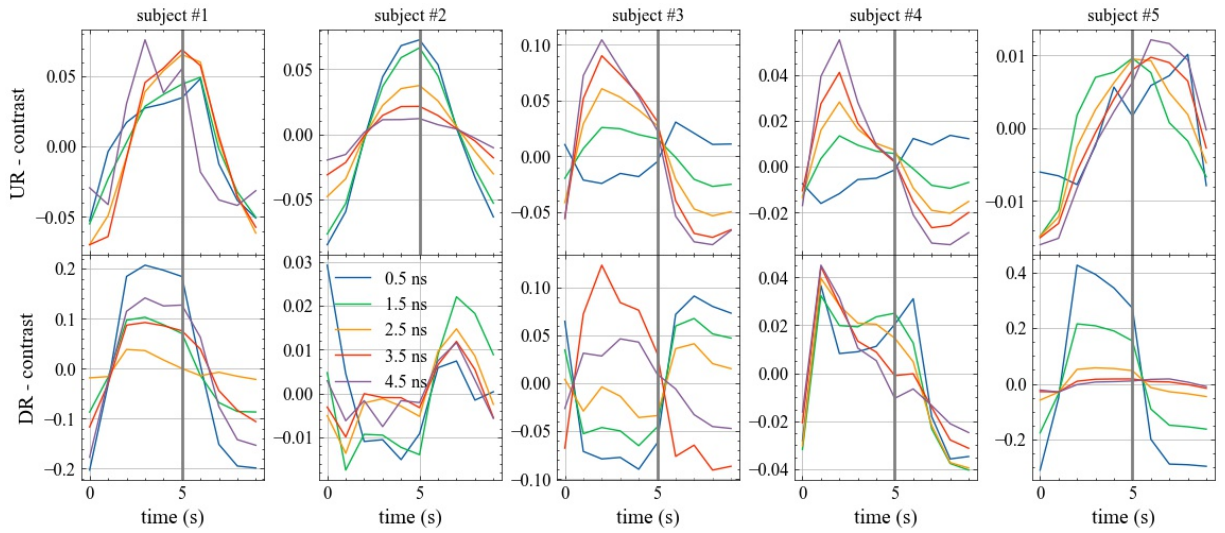

**Figure 5.** Supplementary Figure S5 to Fig. 6.



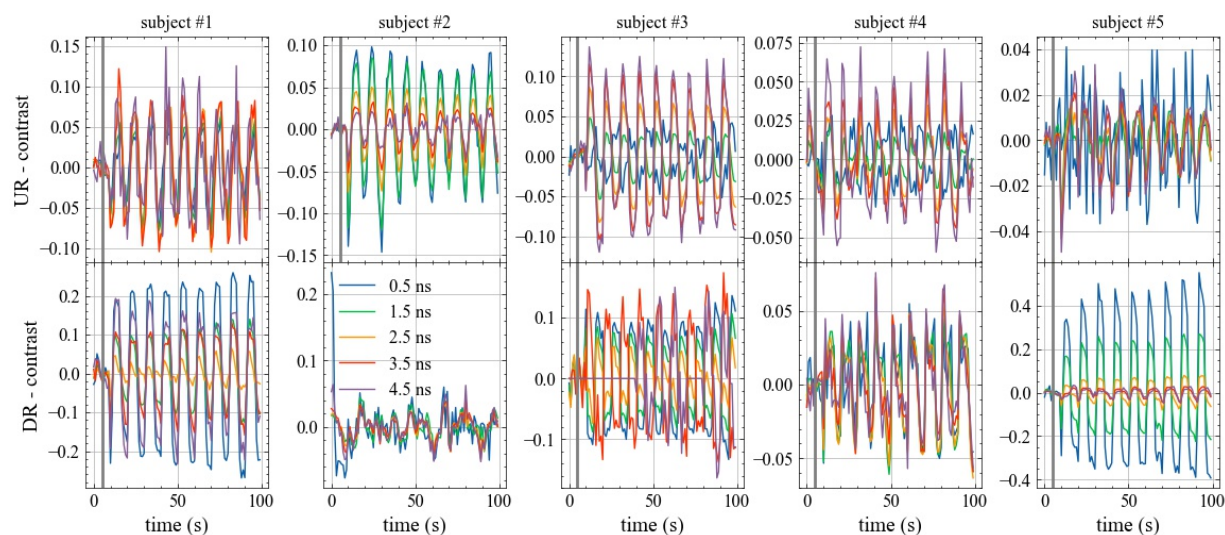

**Figure 6.** Supplementary Figure S6 to Fig. 6.

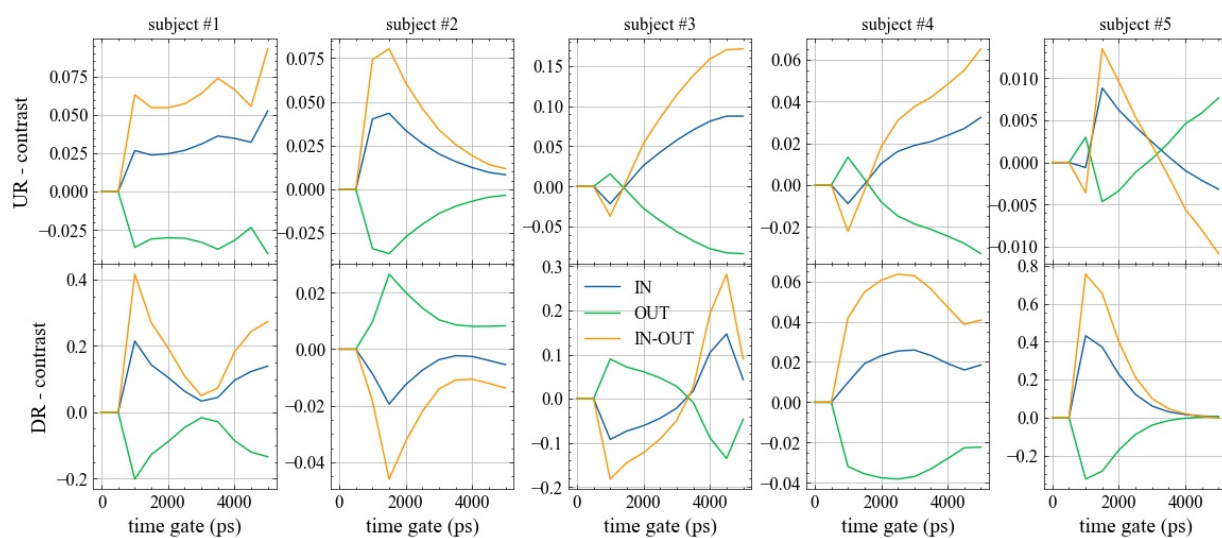

**Figure 7.** Supplementary Figure S7 to Fig. 7.
